# Supplementary material
Source: Research Square preprint supplement (doi:10.21203/rs.3.rs-9876480/v1)
Supplement: Supplementary file 1 [file 2ba825ac7f9cf7789f90d246.docx]

**Article title: Applications of Artificial Intelligence in Antimicrobial Resistance Surveillance, Prediction, and Control in Low- and Middle-Income Countries: A Scoping Review**

Author: Jema Kiazolu | Affiliation: Hasanuddin University| Email: kiazoluje@ul.edu.lr

**Additional file 1: Table S1. Characteristics of included studies and supporting references**

| **No.** | **First Author & Year** | **Country/Region** | **Study Design** | **AI/ML Approach** | **AMR Application Domain** | **Pathogen(s)** | **Key Outcome/Finding** | **Key LMIC Limitation** |
| --- | --- | --- | --- | --- | --- | --- | --- | --- |
| 1 | Murray et al., 2022 | Global (LMIC-inclusive) | Systematic analysis | Predictive/statistical modelling | AMR Surveillance | Multiple bacteria | 4.95 million deaths associated with bacterial AMR in 2019; highest burden in sub-Saharan Africa and South Asia | Ecological; relies on modelled estimates |
| 2 | IACG, 2019 | Global | Policy/epidemiological report | Forecasting models | AMR Surveillance/Policy | Multiple pathogens | Projects 10 million annual deaths from drug-resistant infections by 2050 without urgent action | Non-primary research; narrative projection |
| 3 | Wiens et al., 2019 | Global (HIC-led; LMIC-applicable) | Narrative review | Responsible ML framework | Ethics/Cross-cutting | N/A | Roadmap for responsible ML in healthcare including safety, equity, and transparency principles | Conceptual; lacks empirical LMIC validation |
| 4 | Peiffer-Smadja et al., 2020 | Multi-country | Narrative review | ML for clinical decision support | Diagnostics/Stewardship | Multiple pathogens | ML shows promise for antibiotic prescribing guidance; lacks prospective LMIC validation | No primary data; predominantly HIC evidence base |
| 5 | Moradigaravand et al., 2018 | Multi-country (LMIC data included) | Retrospective genomic study | ML classifiers (pan-genome features) | Resistance Prediction | Escherichia coli | Pan-genome ML predicts AMR phenotype with high accuracy across resistance classes | Limited to E. coli; training data mainly from HICs |
| 6 | Dayan et al., 2021 | Multi-country (LMIC-inclusive) | Prospective ML study | Federated learning | AI Methods/Cross-cutting | N/A (COVID-19 clinical outcomes) | Federated learning enables cross-institutional model training without data sharing; directly applicable to LMIC AMR | COVID-19 focus; AMR application requires further testing |
| 7 | Norori et al., 2021 | Global | Perspective | Bias analysis frameworks | Equity/Cross-cutting | N/A | Calls for open science approaches to address bias in big data and AI for health | Conceptual; limited empirical AMR data |
| 8 | Nguyen et al., 2019 | USA (methodology LMIC-applicable) | Retrospective genomic | ML (WGS-based MIC prediction) | Resistance Prediction | Salmonella spp. (non-typhoidal) | ML predicts MICs and AMR from WGS with high accuracy; scalable approach | HIC training data; LMIC genomic infrastructure required for translation |
| 9 | Tricco et al., 2018 | N/A (methodological) | Methodological reference | N/A | Scoping Review Methodology | N/A | PRISMA-ScR checklist and guidance for transparent scoping review reporting | Methodological reference only |
| 10 | Arksey & O'Malley, 2005 | N/A (methodological) | Methodological reference | N/A | Scoping Review Methodology | N/A | Original five-stage scoping review framework | Methodological reference; predates PRISMA-ScR |
| 11 | Obermeyer et al., 2019 | USA | Retrospective analysis | Algorithmic bias assessment | Equity/Cross-cutting | N/A | Racial bias in commercial health algorithm systematically underserved Black patients | HIC focus; bias mechanisms differ in LMIC contexts |
| 12 | Char et al., 2018 | Global | Commentary/Ethics | Ethical frameworks for ML | Ethics/Cross-cutting | N/A | Ethical challenges in implementing ML in healthcare including accountability and transparency | Conceptual; no empirical data |
| 13 | Okeke et al., 2007 | Africa (multi-country) | Surveillance review | Descriptive epidemiology | AMR Surveillance | Enteric pathogens (Salmonella, E. coli, Shigella) | Growing MDR enteric pathogen burden across Africa; baseline for AI surveillance gap analysis | Retrospective; no AI methods used |
| 14 | Xiong et al., 2018 | China (LMIC-relevant) | Retrospective imaging study | CNN (image classification) | Diagnostics (TB) | Mycobacterium tuberculosis | CNN automates TB detection from chest X-rays with radiologist-comparable accuracy | Requires digital X-ray infrastructure; low-resource validation limited |
| 15 | WHO, 2021 | Global | Policy document | N/A | Digital Health Policy | N/A | WHO Digital Health Strategy 2020–2027: roadmap for ethical, interoperable digital health in LMICs | Policy document; implementation evidence limited |
| 16 | Fleming Fund, 2022 | LMIC (multi-country) | Programmatic guidance | Data systems/RHIS | AMR Surveillance | Multiple pathogens | Practical guide for using DHIS2-based routine health information systems for AMR surveillance in LMICs | Implementation evidence variable; country uptake uneven |
| 17 | Branda & Scarpa, 2024 | Global | Narrative review | Multiple AI methods | AI-AMR Cross-cutting | Multiple pathogens | Reviews AI innovations for AMR including diagnostics, surveillance, and stewardship; highlights global challenges | Broad scope; lacks LMIC-specific empirical grounding |
| 18 | Chang & Chen, 2022 | Multi-country | Commentary | AI for stewardship | Antimicrobial Stewardship | Multiple pathogens | AI and antibiotic stewardship: current state and future potential (BSAC Vanguard Series) | Brief commentary; limited primary evidence |
| 19 | Oonsivilai et al., 2018 | Cambodia (LMIC) | Retrospective + prospective hybrid | ML (random forest, logistic regression) | Antimicrobial Stewardship | Multiple bacteria (paediatric bloodstream) | ML-guided empiric antibiotic prescribing tool for Cambodian children's hospital; improved empiric coverage | Single-centre LMIC study; prospective validation data limited |
| 20 | WHO, 2021 | Global | Policy/ethics document | AI ethics framework | AI Ethics/Cross-cutting | N/A | WHO framework: six core principles for ethics and governance of AI for health in LMIC deployment | Aspirational; implementation compliance unverified |
| 21 | Van Boeckel et al., 2014 | Global (LMIC-inclusive) | Retrospective pharmacoepidemiology | Statistical modelling | Surveillance (antibiotic use) | N/A | Global antibiotic consumption 2000–2010: highest growth rates in LMICs; data for resistance modelling | Pharmaceutical sales proxy; informal sector not captured |
| 22 | Peiffer-Smadja et al., 2020 | Multi-country | Narrative review | ML in clinical microbiology | Diagnostics | Multiple pathogens | Reviews ML applications in clinical microbiology lab; identifies readiness gaps for routine LMIC practice | Mainly HIC evidence; LMIC readiness poorly addressed |
| 23 | Zerfu et al., 2024 | Ethiopia (LMIC) | Cross-sectional | DHIS2 data quality analysis | Surveillance (data infrastructure) | N/A | DHIS2 implementation improves data quality and accessibility in Ethiopian primary health facilities | Single-country; rural completeness still suboptimal |
| 24 | Sun et al., 2025 | China/multi-country (LMIC-inclusive) | Retrospective multicentre | ML (XGBoost and multiple classifiers) | Resistance Prediction | Klebsiella pneumoniae (MDR) | ML predicts MDR K. pneumoniae risk with high AUROC across multiple centres | Retrospective; generalisability to low-resource labs uncertain |
| 25 | Wu et al., 2025 | China | Retrospective | ML prediction methods | Surveillance/Resistance Prediction | Multiple pathogens | ML-based AMR trend prediction methods benchmarked for China; framework applicable to LMIC contexts | HIC-oriented data infrastructure |
| 26 | Peters et al., 2024 | LMIC (multi-country qualitative) | Qualitative exploratory study | Qualitative key expert study | Environmental Surveillance | Environmental AMR | Barriers to environmental AMR surveillance in LMICs: cost, infrastructure, and expertise | Qualitative; limited generalisability |
| 27 | Naghavi et al., 2024 | Global (LMIC-inclusive) | Systematic analysis with forecasting | Statistical/ML forecasting | AMR Surveillance | Multiple bacteria | Global AMR burden 1990–2021: 1.14 million direct deaths in 2021; forecasts project worsening LMIC burden | Modelled estimates; data quality varies by country |
| 28 | Baker et al., 2023 | Global (LMIC-inclusive) | Review | Genomic surveillance/WGS | AMR Surveillance | Multiple pathogens | Genomics for AMR public health surveillance: current capacity and LMIC infrastructure gaps | WGS remains limited in most LMICs |
| 29 | Pui-Ying Iroh Tam et al., 2019 | Malawi (LMIC) | Retrospective surveillance | Statistical trend analysis | AMR Surveillance | Multiple paediatric bloodstream pathogens | AMR emerging in empiric treatment regimens for paediatric bloodstream infections in Malawi, 1998–2017 | Single-country; pre-AI analysis |
| 30 | Kamere et al., 2022 | Africa (8 LMICs) | Scoping review | Descriptive review | Antimicrobial Stewardship | N/A | National antimicrobial stewardship activities across eight African countries: critical gaps identified | Scoping review; variable data quality across countries |
| 31 | Sajib et al., 2021 | Bangladesh (LMIC) | Retrospective genomic | Phylogenetic/genomic ML | Surveillance (typhoid) | Salmonella Typhi | Tracks azithromycin resistance emergence in multiple S. Typhi genotypes using WGS | Single pathogen; WGS infrastructure requirement |
| 32 | Beig et al., 2024 | Global (LMIC-inclusive) | Meta-analysis | Statistical/geospatial mapping | AMR Surveillance | Acinetobacter baumannii (carbapenem-resistant) | Geographical and temporal mapping of CRAB resistance: highest burden in South Asia and MENA | Meta-analysis; data gaps in sub-Saharan Africa |
| 33 | Tanmoy et al., 2018 | Bangladesh (LMIC) | Retrospective genomic | Genomic ML/phylogenomics | Surveillance (typhoid) | Salmonella Typhi | WGS reveals genomic diversity and AMR in S. Typhi Bangladesh; ML-assisted phylogenomics | Single country; limited to one pathogen |
| 34 | Musicha et al., 2017 | Malawi (LMIC) | Retrospective surveillance | Time-series/trend analysis | AMR Surveillance | Multiple bloodstream pathogens | 17-year AMR trend surveillance in Malawi: rising fluoroquinolone and cephalosporin resistance | Single-centre; no AI methods applied |
| 35 | Van Boeckel et al., 2019 | LMIC (global) | Retrospective analysis | Statistical modelling/ML | Surveillance (veterinary) | Multiple animal pathogens | Global trends in AMR in food animals in LMICs: highest growth in poultry in Asia and Africa | Relies on survey data; spatial gaps in Africa |
| 36 | Munk et al., 2022 | Global (LMIC-inclusive) | Cross-sectional genomic | Metagenomic ML/bioinformatics | Environmental Surveillance | Environmental AMR genes | Sewage metagenomics from 101 countries maps global AMR landscape; strong LMIC signal | Wastewater infrastructure required; sampling not standardised |
| 37 | Zhuang et al., 2021 | China (LMIC-relevant) | Retrospective genomic | Random forest (core genome allelic profiles) | Resistance Prediction | MRSA | Random forest on core genome allelic profiles predicts amoxicillin–clavulanate susceptibility in MRSA | China-centric; generalisability to LMIC settings untested |
| 38 | Godijk et al., 2022 | Global | Systematic review | Descriptive/systematic | Surveillance (transmission routes) | Multiple AMR bacteria | Reviews AMR bacterial transmission routes; One Health LMIC surveillance framework applicable | No primary data; no AI methods |
| 39 | Li et al., 2024 | China/multi-country | Retrospective multicentre | ML (multiple classifiers) | Resistance Prediction/Stewardship | MDR organisms (ICU) | ML predicts MDRO colonisation/infection on ICU admission from EHR; high AUROC across centres | ICU EHR data; not applicable without LMIC EHR infrastructure |
| 40 | Jia et al., 2024 | China | Retrospective | Neural network (WGS + expression) | Resistance Prediction | Acinetobacter baumannii (MDR) | Neural network predicts AMR phenotypes in MDR A. baumannii from WGS and gene expression data | Complex input data; LMIC laboratory capacity limited |
| 41 | Jian et al., 2024 | Taiwan (LMIC-relevant) | Retrospective | ML-clinical decision support | Antimicrobial Stewardship | Klebsiella pneumoniae (MDR) | AI-CDSS improves MDR K. pneumoniae management; reduces inappropriate antibiotic use | Hospital HIS required; validation outside Asia limited |
| 42 | Deelder et al., 2019 | Multi-country (LMIC-inclusive) | Retrospective genomic | ML (WGS-based prediction) | Resistance Prediction (TB) | Mycobacterium tuberculosis | ML accurately predicts M. tuberculosis drug resistance from WGS; applicable to high-burden LMICs | WGS availability and cost remain barriers in LMICs |
| 43 | Liu et al., 2024 | Multi-country | Systematic review + meta-analysis | ML model systematic review | Resistance Prediction/Risk Scoring | MDRO | Systematic review of ML prediction models for MDRO colonisation/infection; moderate-high AUROC | Publication bias; most studies from HICs |
| 44 | Iskandar et al., 2021 | LMIC (multi-country) | Scoping review | Descriptive | AMR Surveillance | Multiple pathogens | AMR surveillance in LMICs: fragmented and under-resourced; critical data gaps documented | Scoping review; no AI applications analysed |
| 45 | Laxminarayan et al., 2013 | Global (LMIC focus) | Review/policy analysis | Epidemiological modelling | Surveillance/Policy | Multiple pathogens | Global AMR solutions: emphasises LMIC surveillance gaps and need for global action | Pre-AI era; no ML applications |
| 46 | Wiesmann et al., 2025 | Multi-country (LMIC-relevant) | Retrospective validation | ML (MALDI-TOF mass spectra) | Diagnostics/AST | Multiple pathogens | ML predicts AMR from MALDI-TOF spectra; validation demonstrates transferability across sites | MALDI-TOF availability limited in LMICs |
| 47 | Fleming et al., 2021 | Global (LMIC focus) | Commission report | N/A (policy) | Diagnostics/Policy | N/A | Lancet Commission on diagnostics: AI-enhanced diagnostics essential for transforming LMIC access | Policy/aspirational; implementation evidence limited |
| 48 | Cai et al., 2025 | China | Retrospective | Interpretable ML (SHAP) | Diagnostics | Klebsiella pneumoniae (carbapenem-resistant) | Interpretable ML on MALDI-TOF discriminates CRKP; phylogenetic heterogeneity limits generalisability | Requires MALDI-TOF; limited external validation |
| 49 | Liu et al., 2022 | China (LMIC-relevant) | Retrospective | ML clinical prediction tool | Resistance Prediction/Stewardship | ESBL Enterobacteriaceae (UTI) | ML clinical prediction tool for ESBL UTI guides empiric outpatient prescribing | Outpatient EHR required; LMIC validation absent |
| 50 | Abu-El-Ruz et al., 2025 | Global (LMIC-inclusive) | Scoping review | Descriptive review | Diagnostics/AI | Multiple pathogens | AI in bacterial infection control: scoping review highlights implementation gaps in LMICs | Broad scope; heterogeneous evidence base |
| 51 | Dlamini et al., 2019 | South Africa (LMIC) | Review | WGS/genomic analysis | Resistance Prediction (TB) | Mycobacterium tuberculosis | WGS for drug-resistant TB management in South Africa: gaps and implementation challenges | Single-country; focuses on WGS rather than ML specifically |
| 52 | Yu et al., 2023 | Taiwan (LMIC-relevant) | Retrospective | ML (MALDI-TOF) | Diagnostics/AST | Klebsiella pneumoniae (carbapenem-resistant, colistin-resistant) | Direct prediction of carbapenem/colistin-resistant K. pneumoniae from MALDI-TOF using ML | MALDI-TOF required; external LMIC validation lacking |
| 53 | Arnold et al., 2025 | Global | Commentary | Multiple AI approaches | AI-AMR Cross-cutting | Multiple pathogens | Reviews AI potential for AMR control; identifies translational gaps for LMICs | Commentary; limited primary evidence |
| 54 | Kuang et al., 2022 | Multi-country (LMIC-inclusive TB data) | Retrospective | ML + CNN (WGS) | Resistance Prediction (TB) | Mycobacterium tuberculosis | ML and CNN predict TB drug resistance from WGS with high accuracy across drug classes | Requires WGS infrastructure; performance varies by drug |
| 55 | Ravkin et al., 2024 | Israel (LMIC-relevant) | Retrospective | ML risk assessment tool | Antimicrobial Stewardship | ESBL Enterobacteriaceae | ML tool rules out empirical ESBL-targeted therapy with high negative predictive value | Developed in HIC; LMIC validation absent |
| 56 | Bosetti et al., 2025 | Multi-country | Review | AI-CDSS for prescribing | Antimicrobial Stewardship | Multiple pathogens | Reviews computerised decision support for antimicrobial prescribing for stewardship programmes | No primary LMIC data |
| 57 | Vijay et al., 2023 | India (LMIC) | Programme evaluation | Hospital AMS analysis | Antimicrobial Stewardship | Multiple pathogens | Hospital-based AMS programme in India: outcomes and sustainability | Single-country; limited AI integration |
| 58 | Amin et al., 2023 | Global (LMIC-inclusive) | Systematic review | AI for antibiotic prescribing | Antimicrobial Stewardship | Multiple pathogens | Systematic review of AI to improve antibiotic prescribing; limited LMIC evidence identified | LMIC context underrepresented |
| 59 | Aldea et al., 2025 | Global | Review | Multiple (AI-enhanced diagnostics) | Diagnostics | Multiple pathogens | AI-enhanced AMR detection: reviews classical, molecular, and AI approaches; LMIC readiness gaps | Broad review; limited LMIC empirical data |
| 60 | Haredasht et al., 2025 | USA (methodology transferable) | Retrospective | ML (EHR-based) | Antimicrobial Stewardship | Multiple pathogens (inpatient) | ML predicts antibiotic resistance from EHR data for inpatient stewardship programmes | HIC EHR infrastructure; LMIC applicability requires adaptation |
| 61 | File et al., 2014 | Global | Review | N/A | Antimicrobial Stewardship | N/A | Importance of antimicrobial stewardship for patient and public health: foundational review | Pre-AI era foundational reference |
| 62 | Shamas et al., 2023 | LMIC (multi-country) | Scoping review | Qualitative/descriptive | Antimicrobial Stewardship | N/A | Challenges of implementing antimicrobial stewardship tools in LMICs: workforce, data, governance | Scoping review; variable evidence quality |
| 63 | MacFadden & Daneman, 2024 | Global | Review | AI/ML for prescribing | Antimicrobial Stewardship | Multiple pathogens | Reviews evidence for decision support tools in improving empiric antibiotic prescribing | Limited prospective trial evidence |
| 64 | Sun et al., 2020 | China (LMIC-relevant) | Cross-sectional | Environmental metagenomics/ML | Environmental/One Health Surveillance | Multiple AMR genes (livestock-human interface) | Environmental remodelling of gut microbiota and AMR resistome in livestock farms | WGS-dependent; LMIC metagenomics capacity limited |
| 65 | Falgenhauer et al., 2019 | Ghana (LMIC) | Cross-sectional One Health | Genomic characterisation/ML-assisted | One Health Surveillance | ESBL Escherichia coli | ESBL E. coli characterised in humans and poultry in Ghana; One Health cross-contamination demonstrated | Single-site; limited WGS throughput |
| 66 | Gay et al., 2023 | Madagascar (LMIC) | Cross-sectional One Health | Genomic ML/phylogenomics | One Health Surveillance | ESBL Escherichia coli | One Health compartment analysis in rural Madagascar reveals multiple ESBL E. coli transmission events | Rural One Health; resource-limited WGS pipeline |
| 67 | Muloi et al., 2022 | Kenya (LMIC) | Population genomics | Population genomic ML | One Health Surveillance | Escherichia coli | Population genomics of E. coli in Nairobi livestock-keeping households; rapid AMR dissemination confirmed | Requires WGS; single urban site |
| 68 | Dieye et al., 2022 | Senegal (LMIC) | Cross-sectional One Health | Genomic epidemiology/ML-assisted | One Health Surveillance | Salmonella spp. | WGS-genomics reveals broilers as AMR source for human invasive nontyphoidal salmonellosis in Senegal | Single-country; limited sample size |
| 69 | Seenama et al., 2019 | Thailand (LMIC) | Cross-sectional One Health | MLST/genomic epidemiology | One Health Surveillance | ESBL Escherichia coli | MLST characterises ESBL E. coli in humans and pigs in northern Thailand; cross-species transmission confirmed | Single-region; no ML applied |
| 70 | Abia et al., 2023 | Africa (multi-country) | Review | Descriptive/systematic | Environmental Surveillance | Environmental AMR (wastewater resistome) | African wastewater resistome: knowledge gaps and LMIC surveillance needs mapped | Review; primary surveillance data scarce |
| 71 | Siddique et al., 2025 | Bangladesh (LMIC) | Cross-sectional genomic | WGS/genomic ML | One Health Surveillance | E. coli (bovine mastitis; MDR) | WGS reveals MDR E. coli in bovine mastitis in Bangladesh; ESBL genes identified | Animal health focus; human linkages inferred |
| 72 | Chukwu et al., 2024 | Nigeria (LMIC) | Cross-sectional environmental | Microbiological + genomic surveillance | Environmental Surveillance | Multiple public health pathogens | Surveillance of pathogens in Lagos wastewater canals; AMR pathogens detected in urban environments | Descriptive environmental surveillance; no AI/ML |
| 73 | Kariuki et al., 2022 | Sub-Saharan Africa (LMIC) | Narrative review | Descriptive | AMR Surveillance | Multiple pathogens | AMR rates and surveillance in sub-Saharan Africa: data quality and completeness gaps identified | Narrative; no AI applied |
| 74 | Osena et al., 2025 | Africa (14 LMICs) | Retrospective analysis | Statistical/ML-assisted analysis | AMR Surveillance | Multiple pathogens | AMR in Africa 2016–2019: resistance rates and trends across 14 countries; ML-assisted pattern analysis | Retrospective; heterogeneous data sources |
| 75 | Sartorius et al., 2024 | WHO African Region (LMIC) | Systematic analysis | Statistical modelling | AMR Surveillance | Multiple bacteria | Burden of bacterial AMR in WHO African Region 2019: 230,000 direct deaths; West Africa highest burden | Modelled estimates; data paucity in many countries |
| 76 | Totaro et al., 2025 | Sub-Saharan Africa (LMIC) | Review | Descriptive | AMR Surveillance | Multiple pathogens | Comprehensive landscape review of AMR in sub-Saharan Africa; treatment failure burden documented | Review; no primary AI data |
| 77 | Gahimbare et al., 2024 | WHO Africa (LMIC) | Systematic review | Descriptive | AMR Surveillance | Multiple pathogens | AMR in WHO African Region 2016–2020: high-resistance rates widespread; surveillance gaps persistent | Variable data quality; surveillance gaps |
| 78 | Bernabe et al., 2017 | West Africa (LMIC) | Systematic review + meta-analysis | Statistical meta-analysis | AMR Surveillance | Multiple pathogens | AMR in West Africa: high resistance rates; surveillance systems remain weak | Pre-AI era; data heterogeneity |
| 79 | Okolie et al., 2023 | Africa (multi-country) | Systematic review | Descriptive/systematic | AMR Surveillance systems | Multiple pathogens | Surveillance systems for AMR in Africa: fragmented, under-resourced; limited data integration | AI integration not assessed |
| 80 | Musa et al., 2023 | Africa (multi-country) | Narrative review | Descriptive | Surveillance/Laboratory | Multiple pathogens | Laboratory AMR surveillance and quality management in Africa: challenges and recommendations | Narrative; no AI methods |
| 81 | Gulumbe et al., 2022 | Africa (multi-country) | Review | Descriptive | Surveillance/Stewardship | Multiple pathogens | Stewardship, surveillance, and diagnostic strategies for AMR control in Africa: review | Review; AI integration not addressed |
| 82 | da Costa et al., 2024 | Angola and Africa (LMIC) | Review | One Health approach | One Health Surveillance | Multiple pathogens | Importance of One Health approach to AMR study and surveillance in Angola and African countries | Single-focus review; no primary AI data |
| 83 | Pruden et al., 2021 | Global (LMIC-inclusive) | Commentary | Environmental surveillance framework | Environmental Surveillance | Environmental AMR | Calls for integrated global wastewater AMR surveillance; AI-enhanced monitoring advocated | Commentary; implementation evidence limited |
| 84 | Gholipour et al., 2024 | Global (LMIC-relevant) | Review | Wastewater surveillance + AI | Environmental Surveillance | Environmental AMR (wastewater) | Wastewater AMR surveillance significance and AI applications; LMIC implementation challenges reviewed | Broad review; LMIC primary data scarce |
| 85 | Liguori et al., 2022 | Global | Review | Standardisation framework | Environmental Surveillance | Environmental AMR | Framework for standardised AMR monitoring in water environments; applicable to LMIC wastewater surveillance | Standards not uniformly adopted in LMICs |
| 86 | Tiwari et al., 2022 | Global (LMIC-inclusive) | Systematic review | Systematic review | Environmental Surveillance | Environmental AMR bacterial pathogens (wastewater) | Wastewater surveillance of AMR bacterial pathogens: global evidence and LMIC gaps | Most wastewater surveillance data from HICs |
| 87 | Hendriksen et al., 2019 | Global (LMIC-inclusive) | Cross-sectional metagenomics | Metagenomic ML/bioinformatics | Environmental Surveillance | Environmental AMR genes (sewage) | Global sewage metagenomics surveillance identifies AMR hotspots in LMIC urban areas | Sampling infrastructure uneven in LMICs |
| 88 | Knight et al., 2024 | Multi-country | Retrospective comparative | HT qPCR + metagenomic ML | Environmental Surveillance | Environmental AMR genes | Comparative analysis of qPCR and metagenomic approaches for national AMR wastewater surveillance | Analytical complexity; not validated in LMIC settings |
| 89 | Balcázar, 2025 | Global | Commentary | Wastewater-based surveillance | Environmental Surveillance | Environmental AMR | Wastewater-based surveillance to combat AMR: advocates for global LMIC inclusion | Commentary; no primary data |
| 90 | Price et al., 2026 | Multi-country (LMIC-inclusive) | Systematic review | Systematic review | Environmental Surveillance | Environmental AMR (wastewater) | Urban/rural representation in wastewater AMR surveillance: rural LMICs systematically underrepresented | Primary data gaps in LMICs |
| 91 | Byrnes et al., 2025 | UK (HIC; methodology applicable) | Cross-sectional environmental | qPCR/statistical modelling | Environmental Surveillance | Multiple antimicrobials (hospital and community) | National-scale surveillance of antimicrobials in wastewater; framework transferable to LMICs | HIC validation only; LMIC implementation requires adaptation |
| 92 | Balasubramanian et al., 2023 | Global (LMIC-inclusive) | Point prevalence survey analysis | Statistical analysis | Surveillance (HAI) | Multiple AMR pathogens (HAI) | Global analysis of 99 countries: HAI-AMR burden highest in LMICs; South Asia and Africa most affected | Relies on point prevalence surveys; under-reporting in LMICs |
| 93 | Wolford et al., 2025 | USA | Retrospective | Statistical analysis | Surveillance (HAI) | Multiple AMR pathogens (hospitalised) | AMR-resistant infections among hospitalised US patients: updated burden estimates | HIC focus; methodology transferable to LMIC surveillance |
| 94 | Sievert et al., 2013 | USA | Retrospective surveillance | Statistical analysis | Surveillance (HAI) | Multiple NHSN pathogens | Baseline AMR pathogen burden from NHSN US data 2009–2010; reference for global burden comparison | HIC reference data; pre-AI era |
| 95 | Salmanov et al., 2019 | Ukraine (LMIC-relevant) | Point prevalence survey | Statistical analysis | Surveillance (HAI) | Multiple HAI pathogens | HAI prevalence and AMR in Kyiv hospitals: high rates of MDR pathogens in acute care | Single city; limited to hospital settings |
| 96 | Hadi et al., 2024 | Multi-country (LMIC-inclusive) | Review | Programme evaluation | Antimicrobial Stewardship | Multiple pathogens | Hospital AMS programme evaluation: implementation, process, and outcome measures; LMIC adoption challenges | Variable programme quality; implementation heterogeneity |
| 97 | Karanika et al., 2016 | Global (LMIC-inclusive) | Systematic review + meta-analysis | Meta-analysis | Antimicrobial Stewardship | Multiple pathogens | Hospital AMS programmes reduce length of stay, mortality, and antibiotic costs | Pre-AI era; most studies from HICs |
| 98 | Harun et al., 2024 | LMIC (multi-country) | Scoping review | Qualitative/descriptive | Antimicrobial Stewardship | N/A | Barriers and facilitators of AMS programmes in LMICs: leadership, resources, and data systems key | Scoping review; heterogeneous data |
| 99 | Dona et al., 2020 | Global (LMIC-inclusive) | Systematic scoping review | Systematic review | Antimicrobial Stewardship (paediatric) | Multiple paediatric pathogens | Paediatric AMS programmes: implementation and impact across income settings; LMIC evidence limited | Predominantly HIC evidence |
| 100 | Jo et al., 2025 | South Korea | Prospective programme | Programme evaluation | Antimicrobial Stewardship | Multiple pathogens | AMS programme early outcomes in South Korea: reductions in broad-spectrum antibiotic use | Single-country; limited AI integration |
| 101 | Mei et al., 2021 | Global (LMIC-inclusive) | Review | Descriptive | Environmental Surveillance | AMR genes (environmental) | Distribution of AMR genes in environment: soil, water, sediment; LMIC environmental burden reviewed | Review; no AI methods applied |
| 102 | Delgado-Baquerizo et al., 2022 | Global (LMIC-inclusive) | Cross-sectional global survey | ML/geostatistical modelling | Environmental Surveillance | AMR genes (soil resistome) | Global distribution and environmental drivers of soil antibiotic resistome; ML identifies key predictors | LMIC data density lower |
| 103 | Qiao et al., 2025 | China (LMIC-relevant) | Cross-sectional | Metagenomics + ML | Environmental Surveillance | AMR genes (pharmaceutical wastewater) | Key traits and dissemination of AMR genes in pharmaceutical wastewater receiving environments | China-centric; LMIC pharmaceutical settings differ |
| 104 | Yang et al., 2024 | China (LMIC-relevant) | Cross-sectional | Genomic ML/network analysis | Environmental Surveillance | AMR genes (flowback water–soil) | Dissemination mechanisms of AMR genes from flowback water to soil; ML network analysis | Industrial/extractive focus; limited direct LMIC applicability |
| 105 | Cerqueira et al., 2019 | Global (LMIC-relevant) | Review | Systematic/descriptive | Environmental Surveillance | AMR genes (soil and crops) | AMR genes in soils and crops: distribution, drivers, and LMIC agricultural implications | Review; limited primary LMIC data |
| 106 | Kim et al., 2022 | Global | Systematic review | ML for AMR prediction | Resistance Prediction | Multiple pathogens | ML for AMR prediction: current practice, limitations, and clinical perspective | HIC evidence dominates; LMIC applicability limited |
| 107 | Bilal et al., 2025 | Global (LMIC-inclusive) | Review | ML/AI for AMR prediction | Resistance Prediction | Multiple pathogens | Role of AI and ML in predicting and combating AMR: recent advances and future directions | Review; limited primary LMIC empirical data |
| 108 | Ali et al., 2023 | Global | Review | AI for AMR prediction | Resistance Prediction | Multiple pathogens | AI for AMR prediction: challenges (data quality, generalisability) and opportunities | Review; implementation evidence absent |
| 109 | Li et al., 2024 | Global (LMIC-inclusive) | Review | AI for AMR prediction | Resistance Prediction | Multiple pathogens | AI in predicting pathogenic microorganism AMR: challenges, progress, and prospects | Broad review; limited LMIC-specific analysis |
| 110 | Weiner-Lastinger et al., 2020 | USA | Retrospective surveillance | Statistical analysis | Surveillance (HAI) | Multiple NHSN pathogens | Updated AMR pathogen burden from NHSN US data 2015–2017; rising carbapenem resistance noted | HIC surveillance data; limited LMIC transferability |
| 111 | Gandra et al., 2020 | South and Southeast Asia (LMIC) | Review | Descriptive | AMR Surveillance | Multiple pathogens | AMR surveillance in South and Southeast Asian LMICs: fragmented and under-resourced systems | Descriptive; no AI applications |
| 112 | Elyan et al., 2022 | Global | Review | ML for AMR | Resistance Prediction | Multiple pathogens | ML challenges and opportunities for AMR; data quality and LMIC deployment gaps identified | Review; no primary LMIC empirical data |
| 113 | Sakagianni et al., 2023 | Global (LMIC-relevant) | Literature review | ML for AMR prediction | Resistance Prediction | Multiple pathogens | ML for AMR prediction: high accuracy in lab settings; LMIC validation absent | Most studies HIC-based |
| 114 | Nsubuga et al., 2024 | Africa (LMIC) | Retrospective multi-country | ML (WGS-based) | Resistance Prediction | Escherichia coli | ML predicts AMR in E. coli across multiple African countries; cross-country performance demonstrated | WGS dependency; cross-country performance variable |
| 115 | Ayesiga et al., 2025 | Sub-Saharan Africa (LMIC) | Review | AI-enhanced biosurveillance | AMR Surveillance | Multiple pathogens | AI-enhanced biosurveillance for AMR in sub-Saharan Africa: applications and readiness gaps | Review; primary implementation evidence limited |
| 116 | Muloi et al., 2023 | Global (LMIC-inclusive) | Review | Genomic surveillance/ML | One Health Surveillance | Multiple pathogens (One Health) | Exploiting genomics for AMR surveillance at One Health interfaces; LMIC capacity-building essential | WGS costs prohibitive in many LMICs |
| 117 | Zhao et al., 2024 | Global (LMIC-inclusive) | Cross-sectional analysis | ML/geostatistical modelling | One Health Surveillance (veterinary) | Multiple food animal pathogens | Global surveillance of AMR in food animals using priority drugs maps; ML-driven geographic risk mapping | Animal sector data gaps in sub-Saharan Africa |
| 118 | Cox et al., 2017 | Global (LMIC focus) | Review | Descriptive | Antimicrobial Stewardship | Multiple pathogens | Antibiotic stewardship in LMICs: same principles, different context; adaptations needed | Pre-AI era; identifies contextual barriers |
| 119 | Anahtar et al., 2021 | Global (LMIC-relevant) | Narrative review | ML for AMR/translational | Resistance Prediction | Multiple pathogens | ML for AMR: emerging translational model; need for LMIC-specific approaches highlighted | Predominantly HIC data; translational gaps noted |
| 120 | Khaledi et al., 2020 | Multi-country (LMIC-relevant) | Retrospective genomic | ML molecular diagnostics | Resistance Prediction | Pseudomonas aeruginosa | ML predicts AMR in P. aeruginosa using WGS; ML-enabled molecular diagnostics feasibility demonstrated | Requires WGS; clinical validation limited |
| 121 | Macesic et al., 2017 | Global | Review | ML bioinformatics | Resistance Prediction | Multiple pathogens | ML and novel bioinformatics approaches for AMR; WGS-ML pipeline described | Pre-widespread LMIC WGS; HIC-oriented review |
| 122 | Martínez-Agüero et al., 2019 | Spain (LMIC-applicable methodology) | Retrospective | ML (ICU AMR) | Resistance Prediction/Surveillance | Multiple ICU pathogens | ML techniques identify AMR in ICU; entropy-based feature selection approach | ICU setting; LMIC ICU data infrastructure absent in many settings |
| 123 | Rodríguez-González et al., 2019 | Global (LMIC-relevant) | Review | AI for epidemiology | Surveillance/Outbreak Prediction | Multiple pathogens | Overview of AI for AMR epidemiology; climate change interactions in disease epidemiology | Review; limited LMIC-specific empirical data |
| 124 | Feretzakis et al., 2021 | Greece (LMIC-applicable methodology) | Retrospective | ML (entry-level data) | Resistance Prediction/Stewardship | Multiple pathogens | ML prototype using off-the-shelf techniques and entry-level data; applicable to LMIC settings | Small dataset; single-centre; LMIC validation required |
| 125 | Rabaan et al., 2022 | Global (LMIC-inclusive) | Review | AI for AMR | Resistance Prediction/Stewardship | Multiple pathogens | AI applications for combating AMR; advocates for LMIC AI deployment | Review; implementation evidence lacking |
| 126 | Pennisi et al., 2025 | Global (LMIC-inclusive) | Narrative review | AI/ML for stewardship | Antimicrobial Stewardship | Multiple pathogens | Role of AI and ML in antimicrobial stewardship in public health: narrative review | LMIC stewardship AI evidence limited |
| 127 | Mohakud et al., 2025 | Global (LMIC-inclusive) | Review | AI and ML for AMR | Resistance Prediction/Stewardship | Multiple pathogens | AI and ML for combating AMR: current applications and future challenges reviewed | Review; no primary LMIC data |
| 128 | Cesaro et al., 2025 | Global (LMIC-inclusive) | Review | AI for infectious diseases and AMR | AI-AMR Cross-cutting | Multiple pathogens | Challenges and applications of AI in infectious diseases and AMR; translational gaps for LMICs identified | Review; primary LMIC implementation evidence absent |
| 129 | Ahmed et al., 2020 | Global | Review | Multi-functional ML platform | AI/Cross-cutting | N/A | AI with multi-functional ML platform for healthcare and precision medicine; AMR data integration applicable | Broad scope; no LMIC AMR primary data |
| 130 | Arango-Argoty et al., 2018 | Global (LMIC-relevant) | Methods paper | Deep learning (DeepARG) | Resistance Prediction (genomic) | AMR genes (metagenomic) | DeepARG deep learning predicts AMR genes from metagenomic data; LMIC environmental application | Requires bioinformatics infrastructure |
| 131 | Boolchandani et al., 2019 | Global | Review | WGS-based methods | Surveillance (resistome) | AMR genes (resistome) | Sequencing-based methods for AMR study; applicable to LMIC genomic surveillance | WGS costs and capacity barriers in LMICs |
| 132 | Su et al., 2019 | Global (LMIC-relevant) | Review | ML (WGS-based AMR prediction) | Resistance Prediction | Multiple bacteria | Genome-based prediction of bacterial AMR: review of ML approaches; applicable to LMIC reference labs | Requires WGS; LMIC validation absent |
| 133 | Boolchandani et al., 2019 | Global | Review | Resistome concepts/epidemiology | Surveillance (resistome) | AMR genes (human + environmental) | Resistome in human and environmental microbiomes: emerging epidemiology and surveillance concepts | Conceptual; no primary LMIC data |
| 134 | Mahfouz et al., 2020 | Global | Systematic review | ML (genetic phenotype prediction) | Resistance Prediction | Multiple pathogens | Large-scale assessment of AMR marker databases for genetic phenotype prediction; database inconsistency identified | Database-dependent; LMIC data representation low |
| 135 | Ruppé et al., 2019 | Global (LMIC-relevant) | Methods paper | 3D structure-based ML | Resistance Prediction (resistome) | AMR genes (intestinal resistome) | 3D structure-based ML predicts intestinal resistome; applicable to LMIC environmental genomics | Computationally intensive; LMIC bioinformatics capacity required |
| 136 | Yang et al., 2018 | Global (LMIC-relevant TB data) | Retrospective genomic | ML (WGS TB classification) | Resistance Prediction (TB) | Mycobacterium tuberculosis | ML classifies TB drug-resistance from WGS; applicable to high-burden LMIC TB programmes | WGS infrastructure required; performance varies by drug |

Table legend: All 136 references cited in this scoping review are listed. References 9–10 are methodological framework papers; references 15–16, 20, and 47 are policy or guidance documents. All remaining entries represent primary research or systematic review studies included according to the PRISMA-ScR selection criteria. Study numbers correspond to the reference list in the main manuscript. Abbreviations: AI, artificial intelligence; AMR, antimicrobial resistance; AST, antimicrobial susceptibility testing; AUROC, area under the receiver operating characteristic curve; CDSS, clinical decision support system; CNN, convolutional neural network; CRKP, carbapenem-resistant Klebsiella pneumoniae; EHR, electronic health record; ESBL, extended-spectrum beta-lactamase; HAI, healthcare-associated infection; HIC, high-income country; ICU, intensive care unit; LMIC, low- and middle-income country; MALDI-TOF, matrix-assisted laser desorption/ionisation time-of-flight; MDR, multidrug-resistant; MDRO, multidrug-resistant organism; ML, machine learning; MIC, minimum inhibitory concentration; MRSA, methicillin-resistant Staphylococcus aureus; N/A, not applicable; NHSN, National Healthcare Safety Network; SHAP, SHapley Additive exPlanations; TB, tuberculosis; UTI, urinary tract infection; WGS, whole genome sequencing; XGBoost, extreme gradient boosting.
