# Supplementary material
Source: Research Square preprint supplement (doi:10.21203/rs.3.rs-9876480/v1)
Supplement: Supplementary file 2 [file 77698752469907858d25a463.docx]

**Article title: Applications of Artificial Intelligence in Antimicrobial Resistance Surveillance, Prediction, and Control in Low- and Middle-Income Countries: A Scoping Review**

Author: Jema Kiazolu | Affiliation: Hasanuddin University | Email: kiazoluje@ul.edu.lr

**Additional file 2: Table S2. Comprehensive search strategy**

**Section A. Database search strings and record counts**

Search period: January 2013 – May 2026. Conducted in accordance with PRISMA-ScR guidelines. Boolean operators: AND/OR/NOT. Truncation symbol: *. Three conceptual domains combined in all searches: (1) AI/ML terminology AND (2) AMR terminology AND (3) LMIC/surveillance context. MeSH terms (PubMed) and Emtree terms (Embase) combined with free-text terms using OR.

| **Database** | **Full search string (verbatim)** | **Date range** | **Filters applied** | **Records retrieved** |
| --- | --- | --- | --- | --- |
| **PubMed/MEDLINE** | (("machine learning"[MeSH Terms] OR "machine learning"[tiab] OR "artificial intelligence"[MeSH Terms] OR "artificial intelligence"[tiab] OR "deep learning"[tiab] OR "neural network"[tiab] OR "random forest"[tiab] OR "gradient boosting"[tiab] OR "convolutional neural network"[tiab] OR "recurrent neural network"[tiab] OR "federated learning"[tiab] OR "transfer learning"[tiab] OR "natural language processing"[tiab] OR "NLP"[tiab] OR "explainable AI"[tiab] OR "support vector machine"[tiab] OR "decision tree"[tiab] OR "logistic regression"[tiab] OR "LSTM"[tiab]) AND ("anti-bacterial agents"[MeSH Terms] OR "drug resistance, bacterial"[MeSH Terms] OR "drug resistance, microbial"[MeSH Terms] OR "antimicrobial resistance"[tiab] OR "antibiotic resistance"[tiab] OR "drug resistance"[tiab] OR "multidrug resistance"[tiab] OR "ESBL"[tiab] OR "MRSA"[tiab] OR "carbapenem resistance"[tiab] OR "colistin resistance"[tiab] OR "AMR"[tiab] OR "antimicrobial susceptibility"[tiab] OR "MIC"[tiab] OR "resistome"[tiab]) AND ("developing countries"[MeSH Terms] OR "low-income population"[MeSH Terms] OR "low- and middle-income countr*"[tiab] OR "LMIC"[tiab] OR "sub-Saharan Africa"[tiab] OR "South Asia"[tiab] OR "Southeast Asia"[tiab] OR "Latin America"[tiab] OR "resource-limited"[tiab] OR "resource-constrained"[tiab] OR "surveillance"[tiab] OR "stewardship"[tiab] OR "One Health"[tiab])) | Jan 2013 – May 2026 | Language: EN/FR/ES/PT. Types: journal articles, reviews. No study design filter. | 1,400 |
| **Scopus** | TITLE-ABS-KEY( ("machine learning" OR "artificial intelligence" OR "deep learning" OR "neural network" OR "random forest" OR "gradient boosting" OR "federated learning" OR "natural language processing" OR "explainable AI" OR "support vector machine" OR "convolutional neural network" OR "LSTM") AND ("antimicrobial resistance" OR "antibiotic resistance" OR "drug resistance" OR "multidrug resistance" OR "ESBL" OR "MRSA" OR "carbapenem resistance" OR "AMR" OR "antimicrobial susceptibility" OR "resistome" OR "MIC") AND ("low- and middle-income" OR "LMIC" OR "sub-Saharan Africa" OR "South Asia" OR "Southeast Asia" OR "Latin America" OR "resource-limited" OR "resource-constrained" OR "surveillance" OR "stewardship" OR "One Health" OR "developing countr*") ) AND PUBYEAR > 2012 | Jan 2013 – May 2026 | Document types: Article, Review, Conference Paper. Language: EN/FR/ES/PT. | 900 |
| **Web of Science (Core Collection)** | TS=( ("machine learning" OR "artificial intelligence" OR "deep learning" OR "neural network" OR "random forest" OR "gradient boosting" OR "federated learning" OR "natural language processing" OR "explainable AI" OR "support vector machine" OR "convolutional neural network" OR "LSTM") AND ("antimicrobial resistance" OR "antibiotic resistance" OR "multidrug resistance" OR "ESBL" OR "MRSA" OR "carbapenem resistance" OR "AMR" OR "antimicrobial susceptibility" OR "resistome" OR "MIC") AND ("low- and middle-income" OR "LMIC" OR "sub-Saharan Africa" OR "South Asia" OR "Southeast Asia" OR "Latin America" OR "resource-limited" OR "surveillance" OR "stewardship" OR "One Health" OR "developing countr*") ) AND PY=(2013-2026) | Jan 2013 – May 2026 | Types: Article, Review, Proceedings. Language: EN/FR/ES/PT. Collections: SCI-EXPANDED, SSCI, ESCI. | 600 |
| **Embase** | ('machine learning'/exp OR 'machine learning':ab,ti OR 'artificial intelligence'/exp OR 'deep learning':ab,ti OR 'neural network':ab,ti OR 'random forest':ab,ti OR 'federated learning':ab,ti OR 'natural language processing':ab,ti OR 'explainable artificial intelligence':ab,ti OR 'support vector machine':ab,ti OR 'convolutional neural network':ab,ti OR 'LSTM':ab,ti) AND ('anti-infective agent'/exp OR 'drug resistance'/exp OR 'antimicrobial resistance':ab,ti OR 'antibiotic resistance':ab,ti OR 'multidrug resistance':ab,ti OR 'ESBL':ab,ti OR 'MRSA':ab,ti OR 'carbapenem resistance':ab,ti OR 'AMR':ab,ti OR 'resistome':ab,ti OR 'minimum inhibitory concentration':ab,ti) AND ('developing country'/exp OR 'low income country'/exp OR 'low- and middle-income countr*':ab,ti OR 'LMIC':ab,ti OR 'sub-Saharan Africa':ab,ti OR 'South Asia':ab,ti OR 'Southeast Asia':ab,ti OR 'Latin America':ab,ti OR 'resource-limited':ab,ti OR 'surveillance':ab,ti OR 'stewardship':ab,ti OR 'One Health':ab,ti) AND [2013-2026]/py | Jan 2013 – May 2026 | Record types: Article, Review, Conference Abstract. Language: EN/FR/ES/PT. | 650 |
| **IEEE Xplore** | ("All Metadata":"machine learning" OR "All Metadata":"artificial intelligence" OR "All Metadata":"deep learning" OR "All Metadata":"neural network" OR "All Metadata":"random forest" OR "All Metadata":"federated learning" OR "All Metadata":"convolutional neural network" OR "All Metadata":"NLP") AND ("All Metadata":"antimicrobial resistance" OR "All Metadata":"antibiotic resistance" OR "All Metadata":"drug resistance" OR "All Metadata":"ESBL" OR "All Metadata":"MRSA" OR "All Metadata":"AMR" OR "All Metadata":"resistome") AND ("All Metadata":"LMIC" OR "All Metadata":"low-income" OR "All Metadata":"developing countr*" OR "All Metadata":"surveillance" OR "All Metadata":"stewardship" OR "All Metadata":"resource-limited") | Jan 2013 – May 2026 | Content types: Journals, Conference Publications. | 150 |
| **Google Scholar (first 200 results per cluster)** | Cluster 1: "machine learning" "antimicrobial resistance" "LMIC" Cluster 2: "artificial intelligence" "antibiotic resistance" "low-income countries" Cluster 3: "deep learning" "AMR surveillance" "Africa" OR "South Asia" Cluster 4: "AI" "antimicrobial stewardship" "low- and middle-income" Cluster 5: "federated learning" "antimicrobial resistance" Cluster 6: "machine learning" "One Health" "antimicrobial resistance" Cluster 7: "explainable AI" "antibiotic resistance" Cluster 8: "natural language processing" "antibiotic resistance" "hospital" | Jan 2013 – May 2026 | First 200 results per cluster. No language or document-type filter. Grey literature and preprints eligible. | 350 |
| **Grey literature and supplementary** | WHO Institutional Repository (IRIS): "antimicrobial resistance" AND "artificial intelligence" Fleming Fund Programme reports (2018–2026): all published reports Global AMR R&D Hub reports (2018–2026): all publications GARP country reports (2013–2026): all publications medRxiv/bioRxiv: "antimicrobial resistance" AND "machine learning" AND "LMIC" Reference list screening: all references from included full-text articles Forward citation tracking: five anchor papers (refs 1, 4, 17, 106, 128) | Jan 2013 – May 2026 | Hand-searched. Merged with primary database results before deduplication. | 150 |
| **Total records identified before deduplication** | | | | **4,350** |
| **Records retained after deduplication (for title/abstract screening)** | | | | **3,210** |

**Section B. Inclusion and exclusion criteria (PCC framework)**

| **Inclusion criterion** | **Detail** | **Exclusion criterion** | **Detail** |
| --- | --- | --- | --- |
| **Population (Inclusion)** | Studies involving LMIC settings (World Bank definition) or LMIC-relevant populations, including LICs, LMICs, and UMICs. Multi-country studies with >50% LMIC sites or specific LMIC sub-analyses eligible. | **Population (Exclusion)** | Studies exclusively involving HIC populations or settings, with no LMIC-specific data or disaggregated LMIC analysis. |
| **Concept (Inclusion)** | Studies reporting development, validation, evaluation, or implementation of AI/ML applications targeting: (1) AMR surveillance or epidemiology; (2) antibiotic resistance prediction; (3) AMR diagnostics or AST acceleration; (4) antimicrobial stewardship decision support; (5) AMR outbreak detection or prediction; (6) One Health or environmental AMR surveillance. | **Concept (Exclusion)** | Studies not involving AI or ML methods; studies focused exclusively on non-AMR infectious diseases without AMR reporting; studies addressing antibiotic development or pharmacology without AI surveillance or stewardship applications. |
| **Context (Inclusion)** | Any health system, community, veterinary, agricultural, or environmental context within LMIC settings, including hospital, primary care, community, laboratory, environmental (wastewater, soil, water), and agricultural/livestock settings. | **Context (Exclusion)** | Studies set exclusively in HIC laboratory, clinical, or environmental contexts with no LMIC data component. |
| **Study Design (Inclusion)** | All empirical study designs: retrospective cohort; cross-sectional; prospective; feasibility/pilot; validation; mixed-methods; systematic/scoping reviews with primary AI data; grey literature reports with empirical AI findings. | **Study Design (Exclusion)** | Opinion pieces, editorials, and commentary articles without primary data (included as cited methodological references only); protocol papers without results; book chapters. |
| **Language (Inclusion)** | English, French, Spanish, Portuguese. | **Language (Exclusion)** | All other languages. |
| **Date (Inclusion)** | January 2013 – May 2026. Start date corresponds to emergence of scalable ML methods in clinical and public health literature, predating first major AI-AMR applications identified in pilot searches. | **Date (Exclusion)** | Publications before January 2013. |

**Section C. PRISMA-ScR screening and selection summary**

| **PRISMA-ScR stage** | **n** | **Notes** |
| --- | --- | --- |
| Records identified (all databases, before deduplication) | ~4,350 | Includes grey literature (150) and Google Scholar clusters (350) |
| Duplicates removed | ~1,140 | Deduplication performed in Rayyan; manual verification of borderline duplicates |
| Records retained for title/abstract screening | 3,210 | All records were screened independently by the author. |
| Records excluded at title/abstract screening | 2,890 | Did not meet AI/ML criteria (n ≈ 1,340); no AMR focus (n ≈ 810); HIC-only setting (n ≈ 520); outside date range (n ≈ 220) |
| Full-text articles assessed for eligibility | 320 | Full texts retrieved; 2 not retrievable and excluded |
| Full-text articles excluded | 192 | No primary LMIC data (n = 68); no AI/ML method (n = 47); ineligible design (n = 35); pre-2013 without LMIC relevance (n = 31); duplicate publication (n = 11) |
| **Studies included in final synthesis** | **128** | All 128 studies included in thematic synthesis; no quantitative meta-analysis performed |

**Section D. Controlled vocabulary (MeSH and Emtree terms)**

AI/ML domain — MeSH: "Machine Learning" [MeSH]; "Artificial Intelligence" [MeSH]; "Deep Learning" [MeSH]; "Neural Networks, Computer" [MeSH]; "Natural Language Processing" [MeSH]; "Decision Trees" [MeSH]; "Algorithms" [MeSH]. Emtree: 'machine learning'/exp; 'artificial intelligence'/exp; 'deep neural network'/exp; 'natural language processing'/exp.

AMR domain — MeSH: "Anti-Bacterial Agents" [MeSH]; "Drug Resistance, Bacterial" [MeSH]; "Drug Resistance, Microbial" [MeSH]; "Microbial Sensitivity Tests" [MeSH]; "beta-Lactamases" [MeSH]; "Methicillin-Resistant Staphylococcus aureus" [MeSH]; "Tuberculosis, Multidrug-Resistant" [MeSH]. Emtree: 'anti-infective agent'/exp; 'drug resistance'/exp; 'minimum inhibitory concentration'/exp.

LMIC/context domain — MeSH: "Developing Countries" [MeSH]; "Low-Income Population" [MeSH]; "Population Surveillance" [MeSH]; "Antimicrobial Stewardship" [MeSH]; "One Health" [MeSH]. Emtree: 'developing country'/exp; 'low income country'/exp; 'antimicrobial stewardship'/exp.

Table legend: This file presents the full search strategy used for this scoping review. Section A provides verbatim database search strings, date ranges, and record counts. Section B details the inclusion and exclusion criteria using the Population, Concept, and Context (PCC) framework. Section C presents the PRISMA-ScR flow from identification to inclusion, consistent with Figure 1 in the main manuscript. Section D lists controlled vocabulary terms used. Abbreviations: AI, artificial intelligence; AMR, antimicrobial resistance; ESBL, extended-spectrum beta-lactamase; HIC, high-income country; LIC, low-income country; LMIC, low- and middle-income country; MeSH, Medical Subject Headings; MIC, minimum inhibitory concentration; MRSA, methicillin-resistant Staphylococcus aureus; N/A, not applicable; PCC, Population Concept Context; PRISMA-ScR, Preferred Reporting Items for Systematic Reviews and Meta-Analyses Extension for Scoping Reviews; UMIC, upper-middle-income country; WGS, whole genome sequencing.
